# Supplementary material
Source: publisher site journal article supplement (https://www.spandidos-publications.com/5271/downloadSupplementary)
Supplement: Supplementary file 1 [file downloadSupplementary]

## Sheet: Table S5
Table SVII. FAM83A-AS1 associated genes referred to glycolysis
gene	correlation	p-value
ADH1A	-0.385977	1.45e-19
ADH1B	-0.379345	6.69e-19
ACSS1	-0.351147	3.03e-16
ADH1C	-0.316663	2.43e-13
ALDH9A1	-0.279791	1.26e-10
ENO4	-0.258905	2.96e-09
ADH6	-0.239644	4.29e-08
GCK	-0.221243	4.49e-07
ALDH3A2	-0.209988	1.72e-06
ADH5	-0.203242	3.71e-06
ALDH7A1	-0.201905	4.31e-06
ALDH2	-0.199178	5.83e-06
ACSS2	-0.191806	1.29e-05
AKR1A1	-0.184429	2.78e-05
FBP2	-0.170101	0.000113314
ALDH3A1	-0.162326	0.000232056
ALDOB	-0.162095	0.000236949
ADH7	-0.155139	0.000437688
PCK2	-0.124044	0.00502722
LDHAL6A	-0.120106	0.00661629
BPGM	-0.106672	0.015954
PFKL	-0.106653	0.0159729
FBP1	-0.0861626	0.051815
ALDOC	-0.0770138	0.0822936
ADH4	-0.0721605	0.103581
ENO3	-0.0489067	0.270279
PKLR	-0.0290246	0.513113
PFKM	-0.0279939	0.528196
G6PC3	-0.0204173	0.645514
HK3	-0.016131	0.716291
ADPGK	-0.0109029	0.805973
PGK2	0.00217888	0.960851
G6PC2	0.00644031	0.884642
MINPP1	0.00831472	0.851413
GAPDHS	0.0134362	0.762118
PCK1	0.0145646	0.742816
LDHC	0.0200666	0.651196
PDHB	0.0266735	0.547838
GALM	0.0399484	0.367956
PDHA2	0.0478832	0.280445
PDHA1	0.0700418	0.114147
HKDC1	0.0770022	0.0823398
DLD	0.0859908	0.0522855
ALDH3B1	0.0877956	0.0475166
PGM1	0.0956954	0.0307135
LDHAL6B	0.102448	0.0206663
ALDH1B1	0.104646	0.0180821
PGAM4	0.109048	0.0137414
HK2	0.119343	0.00697188
ENO2	0.123472	0.00523461
PGM2	0.131788	0.00286462
ENO1	0.144481	0.00106785
HK1	0.144666	0.00105192
PGK1	0.165099	0.000180356
PGAM1	0.19338	1.09e-05
LDHB	0.206502	2.57e-06
PKM	0.234587	8.34e-08
GPI	0.2471	1.56e-08
DLAT	0.247721	1.43e-08
ALDOA	0.25094	9.18e-09
TPI1	0.26209	1.86e-09
ALDH3B2	0.268918	6.74e-10
LDHA	0.324849	5.35e-14
GAPDH	0.331669	1.47e-14
PFKP	0.41171	2.77e-22
